# Supplementary material
Source: Elsevier journal article supplement (https://www.sciencedirect.com/science/article/pii/S0212656721000287)
Supplement: mmc1 [file S0212656721000287:mmc1.doc]

**ANEXO 1 – Instrumento NECPAL-Chile**


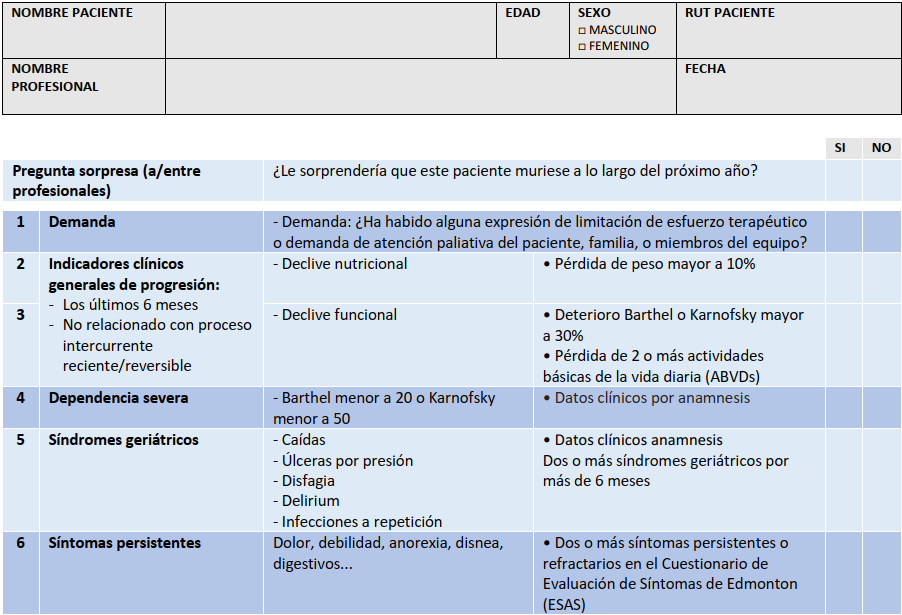

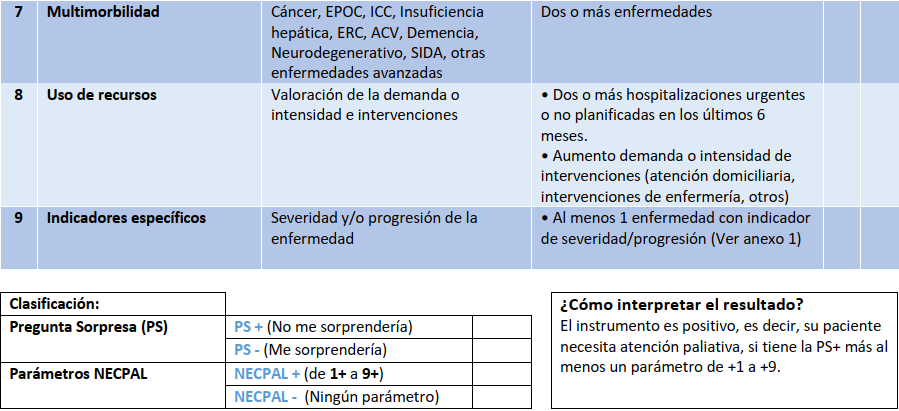


**ANEXO 2 – Instrumento NECPAL-Chile (Anexo 1)**

A continuación, se presenta un grupo de enfermedades por sistema. Si su paciente presenta indicadores de severidad/progresión (segunda columna) considere positivo el ítem 9, independiente que no cuente con todos los estudios que se mencionan.

**
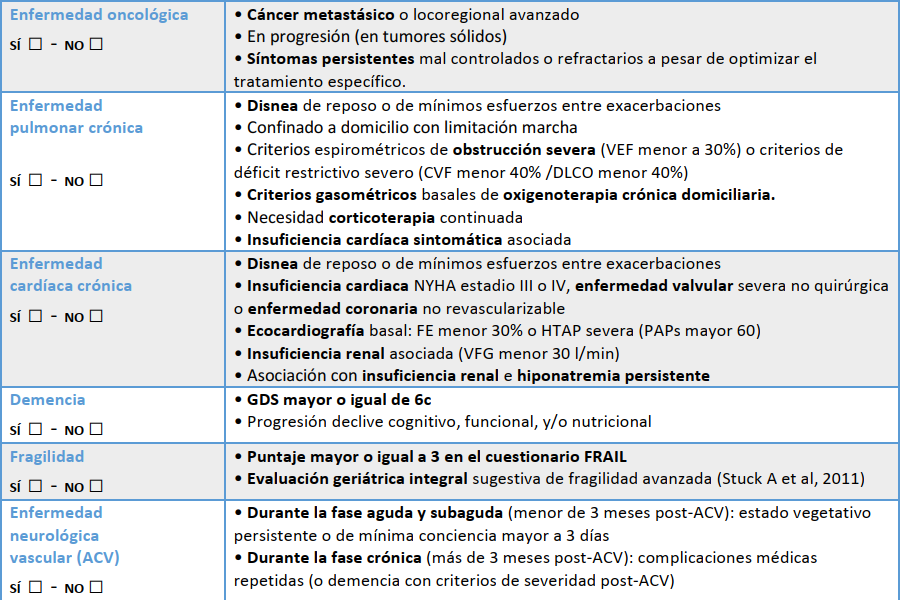

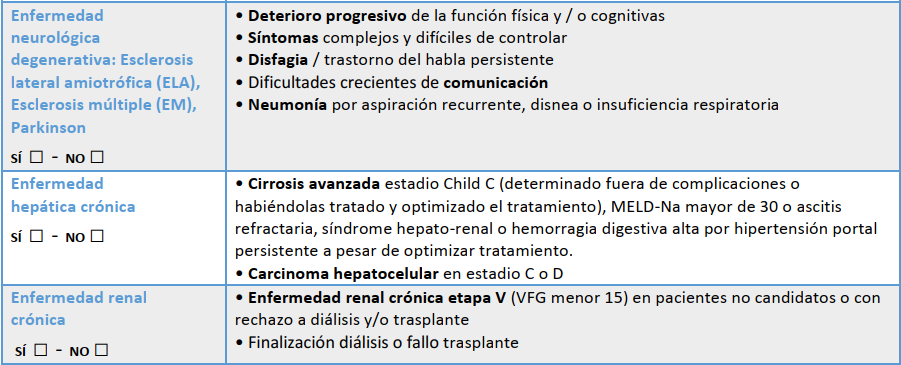
**

(1) Usar instrumentos validados de severidad y/o pronóstico en función experiencia y evidencia. (2) En todos los casos, valorar también distress emocional o impacto funcional severos en paciente (y/o impacto familia) como criterio de necesidades paliativas. (3) En todos los casos, valorar dilemas éticos en toma decisiones. (4) Valorar siempre combinación con multi-morbilidad
